# Supplementary material
Source: Springer Nature journal article supplement (https://www.springermedizin.de/resource/supplementary/12877_2014_1072_MOESM4_ESM.pdf/9440756)
Supplement: MOESM4 [file 9440756]

# Forms for data extraction database

11 June 2013 – revised version

This document contains the data extraction forms used to build a data extraction database and extract data for the meta-review.

## Form 1. Review Bibliographic Information

| Field          | Content                                                   |
|----------------|-----------------------------------------------------------|
| Publication ID |                                                           |
| Author(s)      | e.g. Smith, A; White, LB; Red, K.                         |
| Title          | e.g. The review of pain tools for patients with headaches |
| Year           | e.g. 2013                                                 |
| Journal        |                                                           |
| Volume         |                                                           |
| Issue          |                                                           |
| Pages          |                                                           |
| URL            |                                                           |
|                |                                                           |

**Form 2. Review Quality Assessment (AMSTAR)**

| Field                                                                                                   | Content                                                                                                                                         |
|---------------------------------------------------------------------------------------------------------|-------------------------------------------------------------------------------------------------------------------------------------------------|
| Publication ID                                                                                          | Linking this record to Table 1                                                                                                                  |
| Reviewer                                                                                                |                                                                                                                                                 |
| Date                                                                                                    | Date this record was last modified by the reviewer – automatic date stamp                                                                       |
| <b>Question 1. Was an ‘a priori’ design provided?</b>                                                   | <input type="checkbox"/> Yes<br><input type="checkbox"/> No<br><input type="checkbox"/> Can’t answer<br><input type="checkbox"/> Not applicable |
| <b>Question 2. Was there duplicate study selection and data extraction?</b>                             | <input type="checkbox"/> Yes<br><input type="checkbox"/> No<br><input type="checkbox"/> Can’t answer<br><input type="checkbox"/> Not applicable |
| <b>Question 3. Was a comprehensive literature search performed?</b>                                     | <input type="checkbox"/> Yes<br><input type="checkbox"/> No<br><input type="checkbox"/> Can’t answer<br><input type="checkbox"/> Not applicable |
| <b>Question 4. Was the status of publication (i.e. grey literature) used as an inclusion criterion?</b> | <input type="checkbox"/> Yes<br><input type="checkbox"/> No<br><input type="checkbox"/> Can’t answer<br><input type="checkbox"/> Not applicable |
| <b>Question 5. Was a list of studies (included and excluded) provided?</b>                              | <input type="checkbox"/> Yes<br><input type="checkbox"/> No<br><input type="checkbox"/> Can’t answer<br><input type="checkbox"/> Not applicable |
| <b>Question 6. Were the characteristics of the included studies provided?</b>                           | <input type="checkbox"/> Yes<br><input type="checkbox"/> No<br><input type="checkbox"/> Can’t answer<br><input type="checkbox"/> Not applicable |
| <b>Question 7. Was the scientific quality of the included studies assessed and documented?</b>          | <input type="checkbox"/> Yes<br><input type="checkbox"/> No<br><input type="checkbox"/> Can’t answer<br><input type="checkbox"/> Not applicable |
| <b>Question 8. Was the scientific quality of the included studies</b>                                   | <input type="checkbox"/> Yes                                                                                                                    |

|                                                                                          |                                                                                                                                                 |
|------------------------------------------------------------------------------------------|-------------------------------------------------------------------------------------------------------------------------------------------------|
| used appropriately in<br>formulating conclusions?                                        | <input type="checkbox"/> No<br><input type="checkbox"/> Can't answer<br><input type="checkbox"/> Not applicable                                 |
| <b>Question 9. Were the methods used to combine the findings of studies appropriate?</b> | <input type="checkbox"/> Yes<br><input type="checkbox"/> No<br><input type="checkbox"/> Can't answer<br><input type="checkbox"/> Not applicable |
| <b>Question 10. Was the likelihood of publication bias assessed?</b>                     | <input type="checkbox"/> Yes<br><input type="checkbox"/> No<br><input type="checkbox"/> Can't answer<br><input type="checkbox"/> Not applicable |
| <b>Question 11. Was the conflict of interest stated?</b>                                 | <input type="checkbox"/> Yes<br><input type="checkbox"/> No<br><input type="checkbox"/> Can't answer<br><input type="checkbox"/> Not applicable |
| <b>Reviewer Notes</b>                                                                    |                                                                                                                                                 |

**Form 3. Review content / method**

| <b>Field</b>                 | <b>Content</b>                                                                  |
|------------------------------|---------------------------------------------------------------------------------|
| Publication ID               | Linking this record to Form 1                                                   |
| Reviewer                     |                                                                                 |
| Date                         |                                                                                 |
| Aim of Review/Objectives     |                                                                                 |
| Number of included studies   |                                                                                 |
| Search dates                 | Years covered in the review – e.g. 2000 – 20013                                 |
| Databases searched           |                                                                                 |
| Country of origin            |                                                                                 |
| Inclusion/exclusion criteria |                                                                                 |
| Methods of Analysis          |                                                                                 |
| Quality of the studies       | What the authors thought about the quality and risk of bias of original studies |
| Recommendations from authors |                                                                                 |
| Tools included in the review | List - Link to Form 4                                                           |
| <b>Reviewer Notes</b>        |                                                                                 |

#### Form 4. Tool Validity/Reliability/Utility Data

| Field                 | Content                                                                                           |
|-----------------------|---------------------------------------------------------------------------------------------------|
| Name of Tool          |                                                                                                   |
| Publication ID        | Linking this record to Form 1                                                                     |
| Reviewer              |                                                                                                   |
| Date                  | Date this record was last modified by the reviewer – automatic date stamp                         |
| Number of studies     | Number of studies used by the Publication to inform the analysis                                  |
| List of studies       | List the studies used as the source for this evaluation                                           |
| Purpose of tool       | Describe purpose of tool as outlined in the review                                                |
| Background            | What review authors suggest was the purpose of the tool and who it was designed to be used by     |
| Description           | Describe the tool itself- number of items, what they are designed to measure                      |
| User-centredness      | What does the review say about where the tool items were generated from                           |
| Setting               | The setting the tool was designed for and the setting where it was tested or used (if different). |
| Reliability           | Data providing evidence on tool reliability                                                       |
| Validity              | Data providing evidence on tool validity                                                          |
| Specificity           | Data providing evidence on tool specificity                                                       |
| Sensitivity           | Data providing evidence on tool sensitivity                                                       |
| Feasibility           | How easy is it to use - how much training is needed?                                              |
| Clinical Utility      | Evidence of clinical utility and whether the tool has been used in/tested in practice             |
| Other comments        | Anything else relevant to the study                                                               |
| <b>Reviewer Notes</b> |                                                                                                   |
